# Supplementary material
Source: publisher figshare collection journal article supplement (https://acs.figshare.com/ndownloader/files/13189520)
Supplement: Supplementary file 1 [file 13189520]

## Supporting Information for

# Rational Design of High-Performance Continuous-Flow Microreactors Based on Gold Nanoclusters and Graphene for Catalysis

*Yanbiao Liu<sup>a,c,d\*</sup>, Xiang Liu<sup>a</sup>, Shengnan Yang<sup>a</sup>, Fang Li<sup>a,c</sup>, Chensi Shen<sup>a,c</sup>, Manhong Huang<sup>a,c</sup>, Junjing Li<sup>d</sup>, Ricca Rahman Nasaruddin<sup>b</sup>, Jianping Xie<sup>b\*</sup>*

<sup>a</sup> Textile Pollution Controlling Engineering Center of Ministry of Environmental Protection, College of Environmental Science and Engineering, Donghua University, 2999 North Renmin Road, Shanghai 201620, P. R. China. E-mail: [yanbiaoliu@dhu.edu.cn](mailto:yanbiaoliu@dhu.edu.cn); Fax: +86 21 6779 2522; Tel: +86 21 6779 8752.

<sup>b</sup> Department of Chemical and Biomolecular Engineering, National University of Singapore, 4 Engineering Drive 4, 117585 Singapore, E-mail: [chexiej@nus.edu.sg](mailto:chexiej@nus.edu.sg); Fax: +65 6516 1936; Tel: +65 6516 1067.

<sup>c</sup> Shanghai Institute of Pollution Control and Ecological Security, 1239 Siping Road, Shanghai 200092, P. R. China.

<sup>d</sup> State Key Laboratory of Separation Membranes and Membrane Processes, Tianjin Polytechnic University, 399 Binshuixi Avenue, Tianjin 300387, P. R. China.

**Supporting Information:** 1 table and 14 figures.

**Table S1.** Characteristics of three real water samples.

| Real water sample                                                 | COD <sub>Cr</sub> | pH   | Conductivity | TDS        |
|-------------------------------------------------------------------|-------------------|------|--------------|------------|
| tap water                                                         | <25 mg/L          | 7.2  | 569.3 s/cm   | 287.4mg/L  |
| surface water                                                     | 84 mg/L           | 8.2  | 676.5 s/cm   | 337.1 mg/L |
| alkali-decrement wastewater<br>(diluted by 1000 times before use) | 37600 mg/L        | 13.6 | 90.36 ms/cm  | 45.0 g/L   |

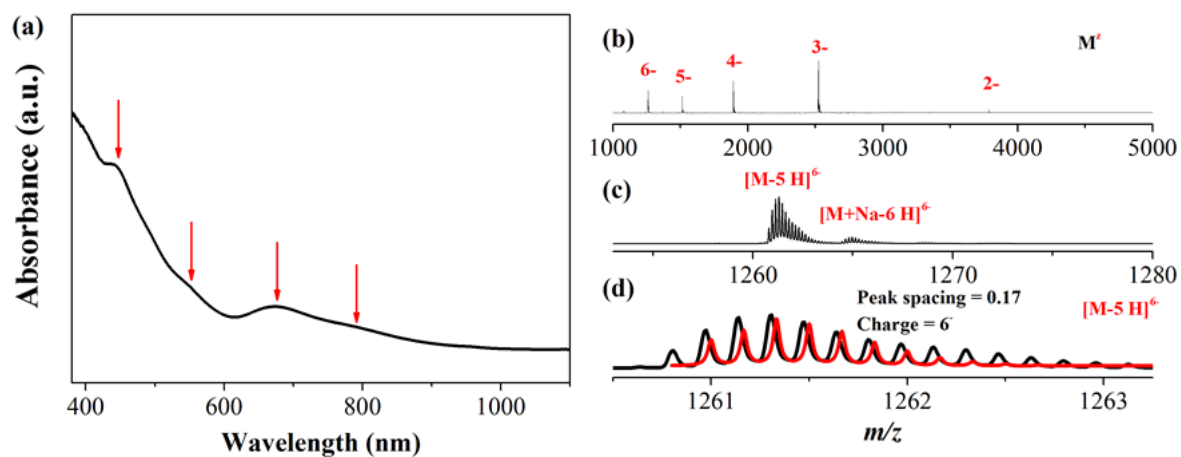

**Figure S1.** (a) UV-vis absorption spectra and (b-d) ESI mass spectra of the as-synthesized  $\text{Au}_{25}(\text{MHA})_{18}$  clusters. M in (b-d) denotes  $\text{Au}_{25}(\text{MHA})_{18}$  and the red line in (d) is the simulated isotope pattern of  $[\text{Au}_{25}(\text{MHA})_{18} - 5\text{H}]^{6-}$ .

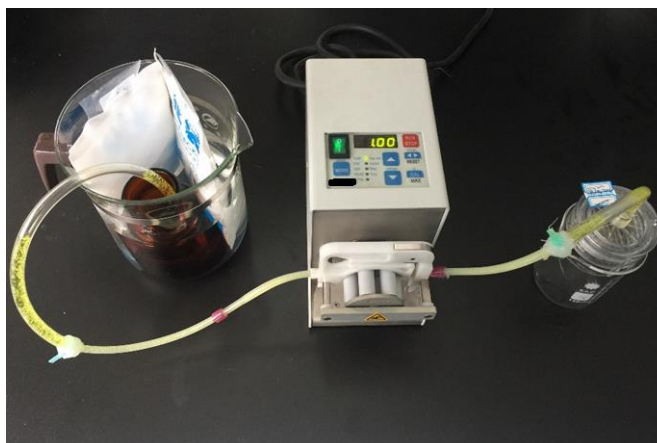

**Figure S2.** Experimental setup for the continuous flow catalytic reaction.

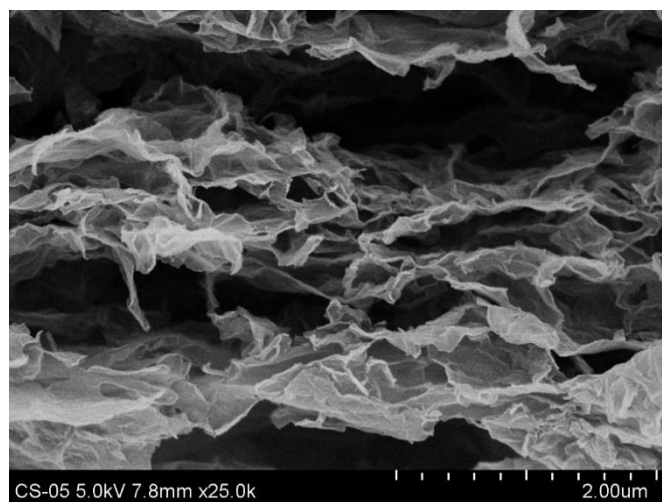

**Figure S3.** FESEM image of cross-sectional analysis of the AuNC/4h-rGO catalytic membranes at high magnification, indicating the presence of nanochannels that are permeable to fluid.

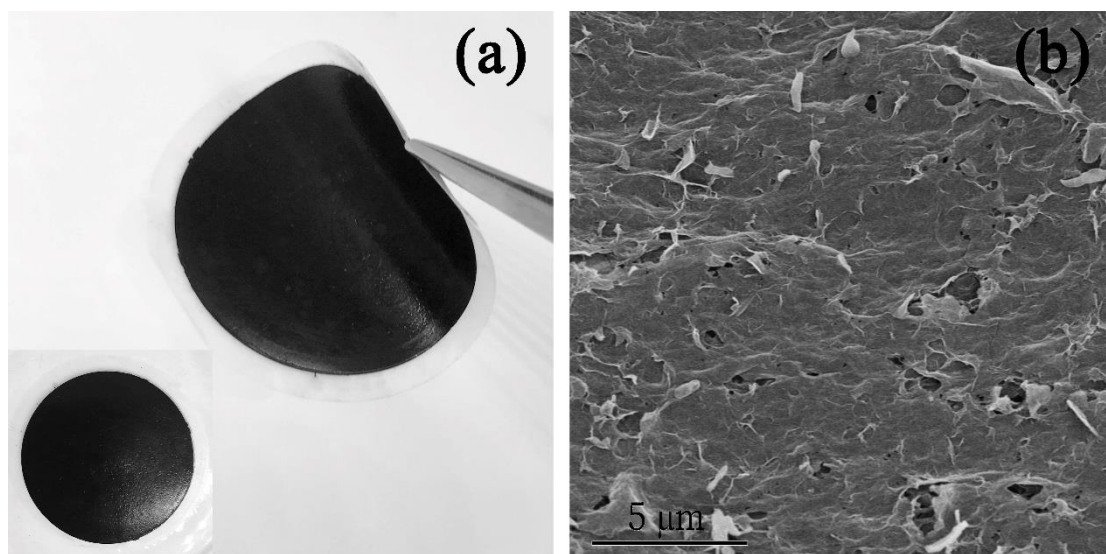

**Figure S4.** Photograph (a), FESEM image (b) of the AuNC/rGO membrane.

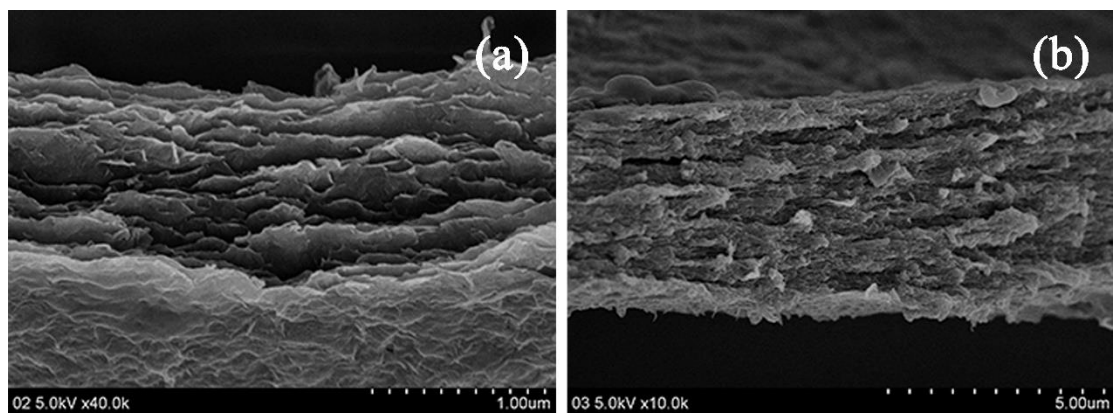

**Figure S5.** FESEM images for cross sectional analysis of the as-fabricated AuNC/4h-rGO hybrid catalytic membrane: 5 mg rGO (left) and 10 mg rGO (right).

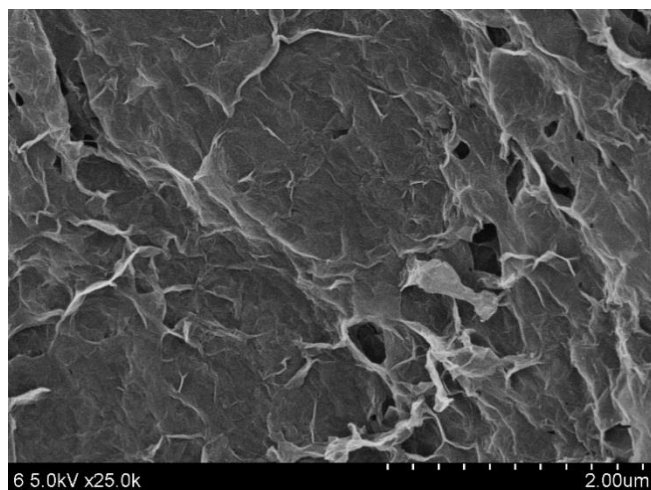

**Figure S6.** FESEM image of a typical rGO membrane.



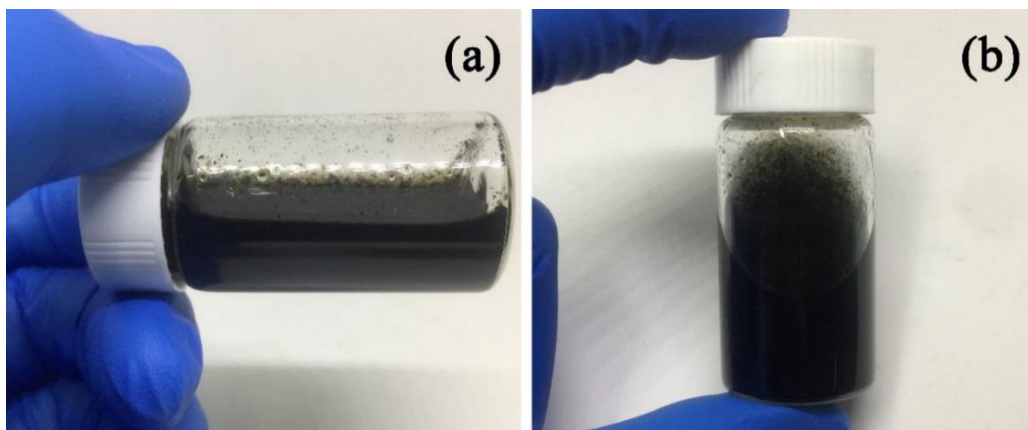

**Figure S7** (a) Digital picture of a 10h-rGO in DI-H<sub>2</sub>O after 2 h continuous ultrasonication; (b) Digital picture of a 20h-rGO in AuNC solution after 2 h continuous ultrasonication.

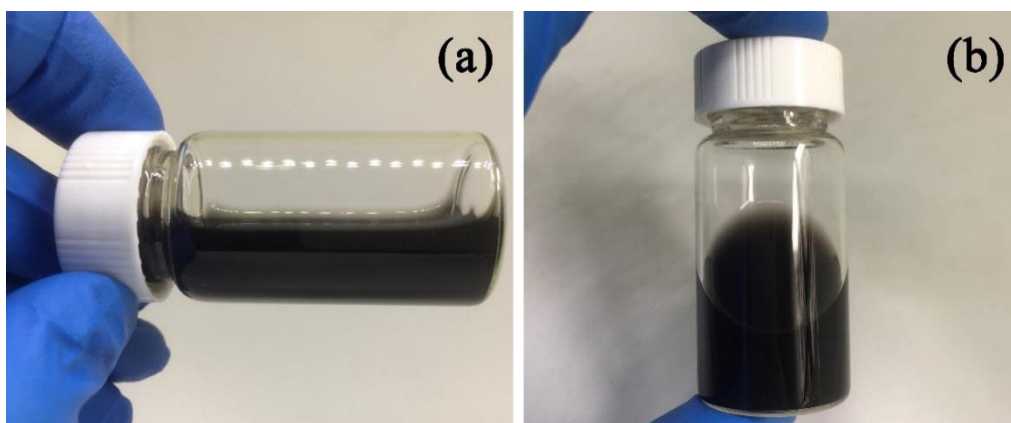

**Figure S8.** Digital picture of a 4h-rGO in AuNC solution after 20 min ultrasonication treatment.

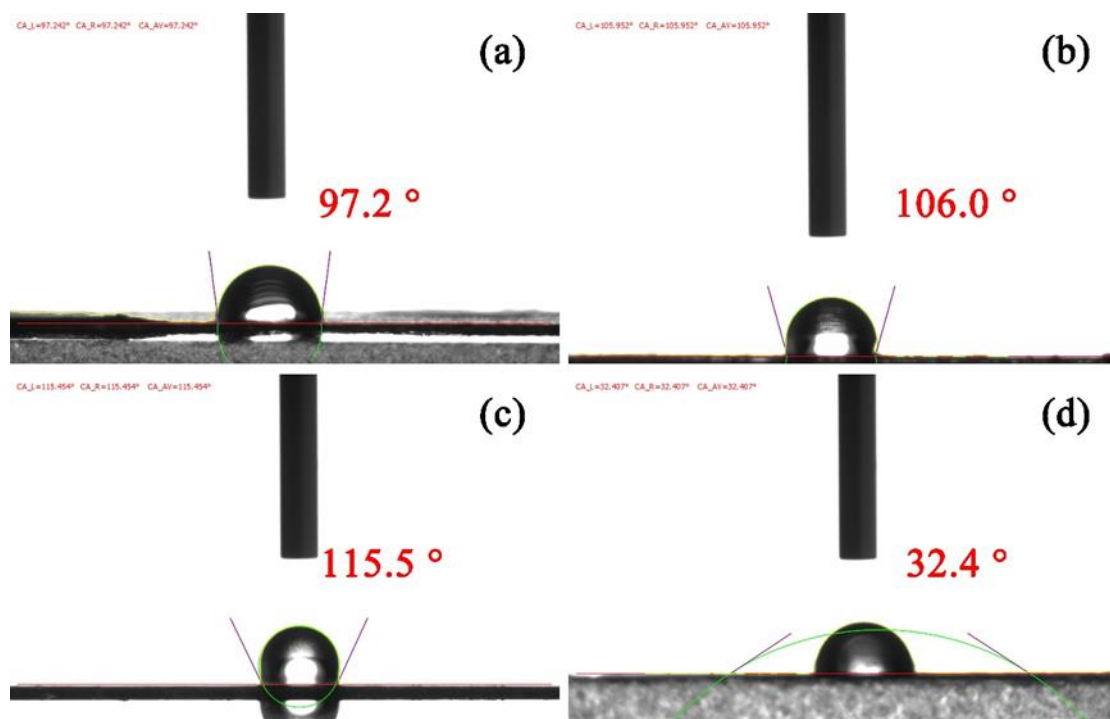

**Figure S9.** Measurement of static contact angle of a water drop on rGO membrane surface with 4 h (a), 10 h (b), and 20 h (c) hydrothermal treatment. (d) The profile of a water drops on the AuNC/4h-rGO membrane (with 10 mol Au loading).

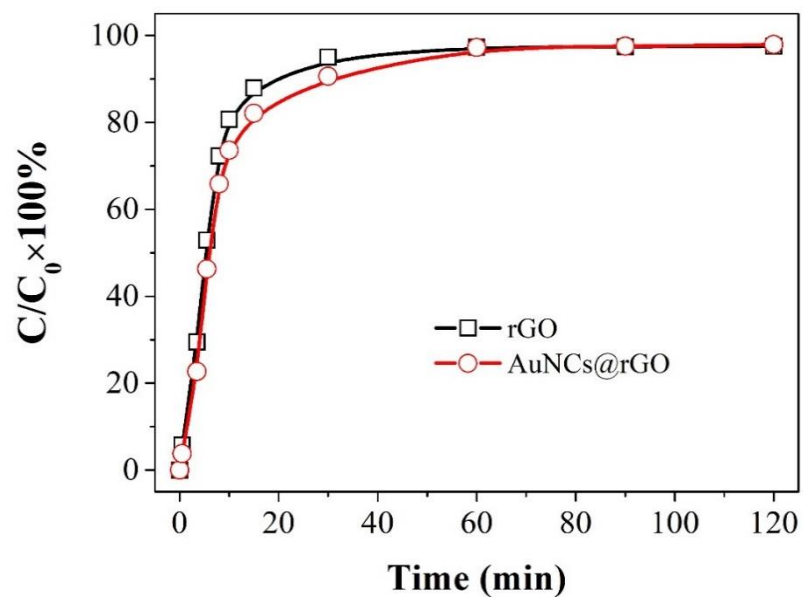

**Figure S10.** Breakthrough curves of rGO membrane and AuNC/4h-rGO membrane of 4-NP only.

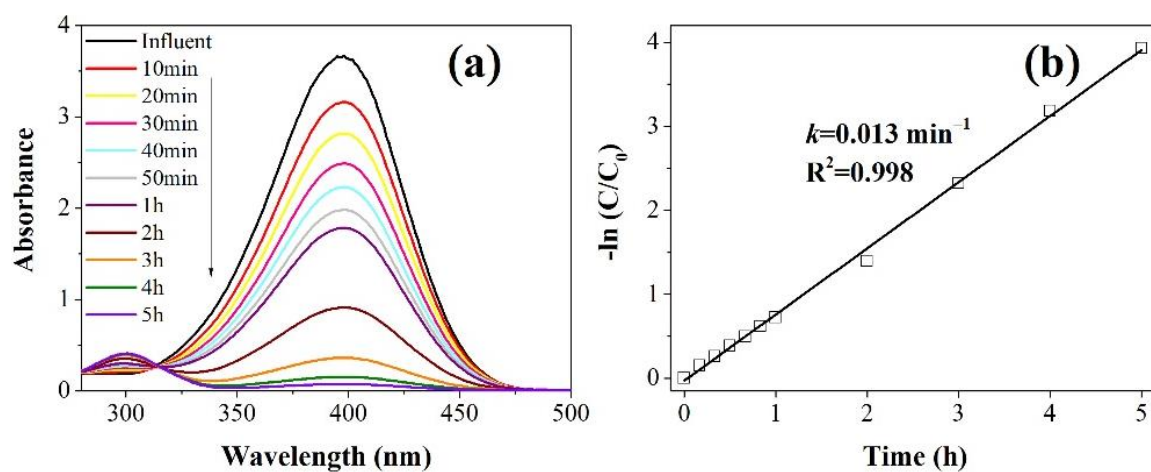

**Figure S11.** (a) Time-dependent UV-vis adsorption spectra and (b) The reaction kinetics for the conversion of 4-NP in a batch reactor using AuNC/4h-rGO catalytic membrane.

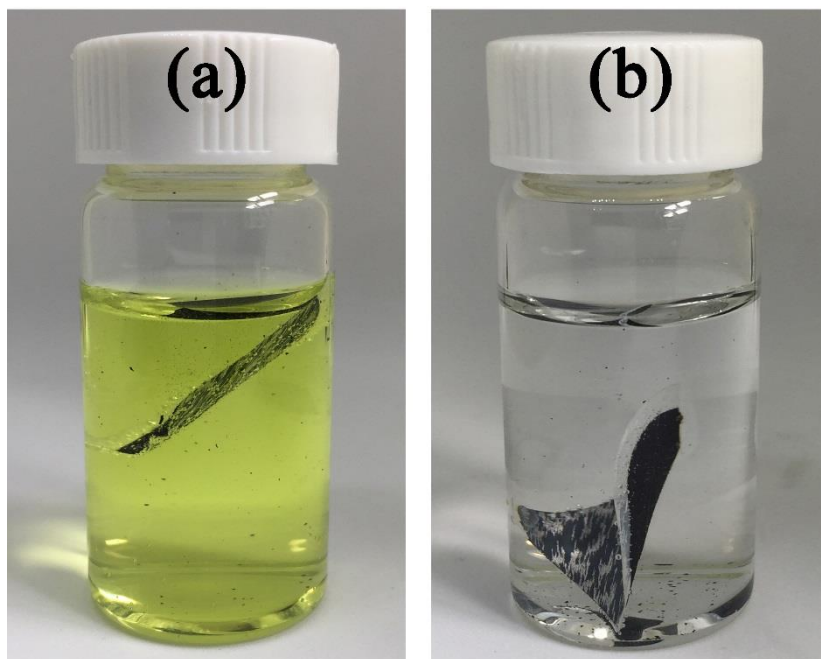

**Figure S12.** Digital photos of the batch reactor (a, at the beginning; b, after 5 h reaction) towards the conversion of 4-nitrophenol using the AuNC/4h-rGO hybrid membrane.

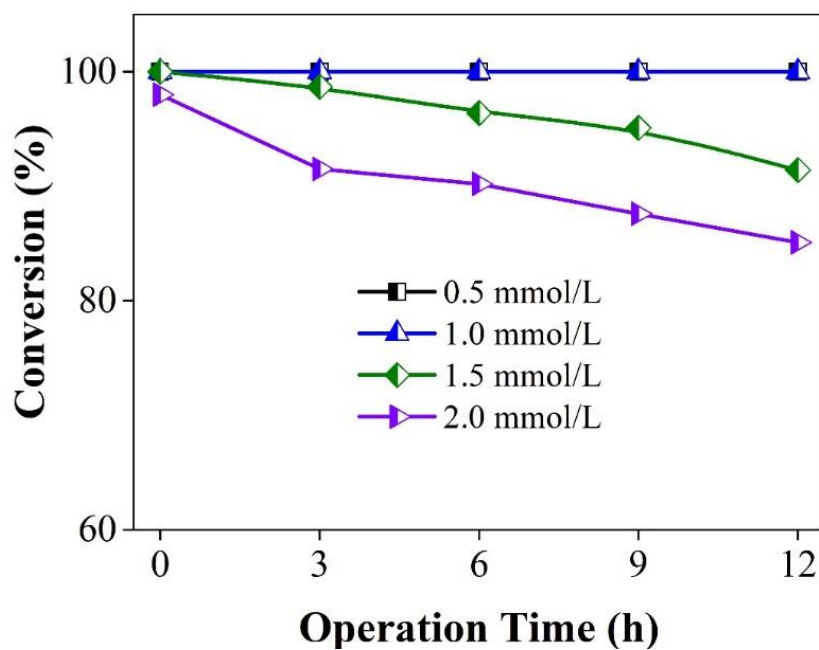

**Figure S13.** The effect of operation time and 4-NP concentration on the catalytic performance of an AuNC/4h-rGO membrane.

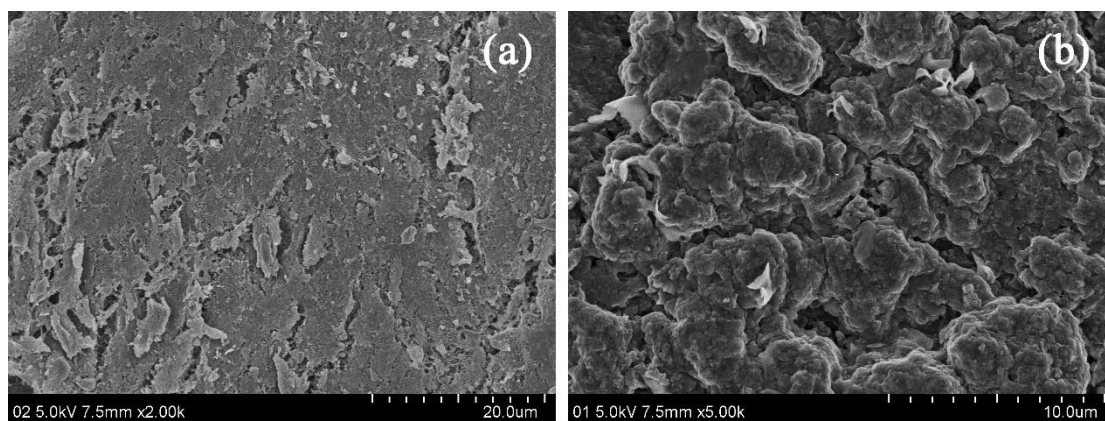

**Figure S14.** FESEM images of the AuNC/4h-rGO catalytic membrane after 12 h continuous operation (at different magnifications).
